# Supplementary material
Source: PubMed Central journal article supplement (PMC7341924)
Supplement: rspb20200439supp1.pdf [file rspb20200439supp1.pdf]

## **Supplementary material S1**

**from "Tolerant and intolerant macaques show different levels of structural complexity in their vocal communication"**

**Table 1. Information about groups and subjects.<sup>1</sup>**

| Groups                    | Dates of group foundation and study                   | Composition of groups                                      | Name and age in years of females <sup>2</sup>                                                                                                                                                                                                                                                                                                                            |
|---------------------------|-------------------------------------------------------|------------------------------------------------------------|--------------------------------------------------------------------------------------------------------------------------------------------------------------------------------------------------------------------------------------------------------------------------------------------------------------------------------------------------------------------------|
| rhesus macaque group Ma   | founded in 2004, studied in Jul–Oct 2016              | 10 adult females, 3 adult males, 22 immatures <sup>3</sup> | <i>Pip</i> (14), <i>But</i> (13), <i>Isa</i> (11), <i>Nil</i> (10), <i>Hoe</i> (10), <i>Wie</i> (9), <i>Lok</i> (7), <i>Aus</i> (6), <i>Mon</i> (5), <i>Pan</i> (5)                                                                                                                                                                                                      |
| rhesus macaque group Mb   | founded in 2004, studied in Jul–Oct 2016              | 6 adult females, 1 adult male, 24 immatures                | <i>Tro</i> (13), <i>Plo</i> (12), <i>Hat</i> (10), <i>Jah</i> (8), <i>Kwe</i> (7), <i>Ymi</i> (6)                                                                                                                                                                                                                                                                        |
| Tonkean macaque group Tb  | founded in 1978, studied in Feb–May 2016              | 4 adult females, 6 adult males, 5 immatures                | <i>Gil</i> (27), <i>Gai</i> (9), <i>Giu</i> (9), <i>Lis</i> (5)                                                                                                                                                                                                                                                                                                          |
| Tonkean macaque group Tc  | founded in 2005, studied in Sept–Dec 2014             | 4 adult females, 4 adult males, 8 immatures                | <i>Pal</i> (13), <i>Sop</i> (11), <i>Pam</i> (8), <i>Pap</i> (6)                                                                                                                                                                                                                                                                                                         |
| Tonkean macaque group Td  | founded in 2007, studied in Mar–May 2015              | 3 adult females, 5 adult males, 7 immatures                | <i>Sib</i> (12), <i>Tet</i> (11), <i>Tan</i> (11)                                                                                                                                                                                                                                                                                                                        |
| Tonkean macaque group Te  | founded in 2009, studied in Sept–Dec 2014             | 2 adult females, 2 adult males, 3 immatures                | <i>Nin</i> (15), <i>Nif</i> (9)                                                                                                                                                                                                                                                                                                                                          |
| Japanese macaque group Fw | founded in 1974, studied in Mar–Aug 2005              | 13 adult females, 4 adult males, 10 immatures              | <i>Has</i> (10), <i>Min</i> (6), <i>Mia</i> (5), <i>Nir</i> (6), <i>Rek</i> (14), <i>Rum</i> (17), <i>Mil</i> (9), <i>Bel</i> (5), <i>Lar</i> (5), <i>Som</i> (18), <i>Sar</i> (8), <i>Jes</i> (7), <i>Ren</i> (20)                                                                                                                                                      |
| Japanese macaque group Ft | founded in 1970/1971, studied in Mar–Jul 2005         | 16 adult females, 6 adult males, 24 immatures              | <i>Ame</i> (25), <i>Iwa</i> (11), <i>Kak</i> (8), <i>Kin</i> (15), <i>Kam</i> (5), <i>Kur</i> (9), <i>Mor</i> (22), <i>Shi</i> (10), <i>Sha</i> (8), <i>Tan</i> (24), <i>Tak</i> (17), <i>Tsu</i> (21), <i>Umi</i> (19), <i>Ume</i> (8), <i>Yam</i> (13), <i>Yuk</i> (21)                                                                                                |
| Crested macaque group Nr1 | wild population, studied between Sept 2010 & Feb 2011 | 28 identifiable adult females                              | <i>Ani</i> , <i>Adi</i> , <i>Bea</i> , <i>Bas</i> , <i>Cin</i> , <i>Dor</i> , <i>Ern</i> , <i>Fen</i> , <i>Glo</i> , <i>Hel</i> , <i>Isa</i> , <i>Jos</i> , <i>Kat</i> , <i>Leo</i> , <i>Min</i> , <i>Nur</i> , <i>Oli</i> , <i>Pol</i> , <i>Qut</i> , <i>Ros</i> , <i>Sup</i> , <i>Tut</i> , <i>Eli</i> , <i>Vod</i> , <i>Wi</i> , <i>Big</i> , <i>Yan</i> , <i>Zoe</i> |
| Crested macaque group Npb | wild population, studied between Sept 2010 & Feb 2011 | 23 identifiable adult females                              | <i>Agn</i> , <i>Bia</i> , <i>Cic</i> , <i>Dea</i> , <i>Eva</i> , <i>Fio</i> , <i>Geu</i> , <i>Her</i> , <i>Iye</i> , <i>Jan</i> , <i>Kri</i> , <i>Lid</i> , <i>Nao</i> , <i>Oma</i> , <i>Ram</i> , <i>Ste</i> , <i>Jam</i> , <i>Mal</i> , <i>Zor</i> , <i>Pap</i> , <i>Val</i> , <i>Tem</i> , <i>Upi</i>                                                                 |

<sup>1</sup>Arlet ME, Jubin R, Masataka N, Lemasson A. 2015 Grooming-at-a-distance by exchanging calls in non-human primates. *Biol. Lett.* **11**, 20150711 – De Marco A, Rebout N, Massiot E, Sanna A, Sterck EHM, Langermans JAM, Cozzolino R, Thierry B, Lemasson A. 2019 Differential patterns of vocal similarity in tolerant and intolerant macaques. *Behaviour* **156**, 1–25 – Micheletta J, Engelhardt A, Matthews L, Agil M, Waller BM. 2013 Multicomponent and multimodal lipsmacking in crested macaques (*Macaca nigra*). *Am. J. Primatol.* **75**, 763–773 – Takahashi T, Higashino A, Takagi K, Kamanaka Y, Abe M, Morimoto M, Kang KH, Goto S, Suzuki J, Hamada Y, Kageyama T. 2006 Characterization of obesity in Japanese monkeys (*Macaca fuscata*) in a pedigreed colony. *J. Med. Primatol.* **35**, 30–37.

<sup>2</sup>Age at the beginning of data collection. The names of the sampled females are in italics.

<sup>3</sup>Individuals at least 5 years of age.

**Table 2. Acoustic distances: results of linear discriminant analyses for pairwise distances between species in each social context.**

| Pairwise comparisons         | Agonistic context |          | Affiliative context |          | Neutral context |          |
|------------------------------|-------------------|----------|---------------------|----------|-----------------|----------|
|                              | distance          | <i>p</i> | distance            | <i>p</i> | distance        | <i>p</i> |
| Japanese vs. rhesus macaque  | 718               | 0.001    | 85.7                | 0.077    | 211             | < 0.001  |
| Japanese vs. Tonkean macaque | 206               | 0.167    | 247                 | < 0.001  | 106             | 0.025    |
| Japanese vs. crested macaque | 1006              | < 0.001  | 669                 | < 0.001  | 565             | < 0.001  |
| rhesus vs. Tonkean macaque   | 513               | < 0.001  | 161                 | 0.033    | 105             | < 0.001  |
| rhesus vs. crested macaque   | 1727              | < 0.001  | 584                 | < 0.001  | 776             | < 0.001  |
| Tonkean vs. crested macaque  | 1211              | < 0.001  | 422                 | < 0.001  | 670             | < 0.001  |

**Table 3. Vocal diversity and flexibility: results of post-hoc pairwise comparisons between species in each social context.**

| Pairwise comparisons                                    | Agonistic context |       |          |          | Affiliative context |       |          |          | Neutral context |       |          |          |
|---------------------------------------------------------|-------------------|-------|----------|----------|---------------------|-------|----------|----------|-----------------|-------|----------|----------|
|                                                         | estimate          | SE    | <i>t</i> | <i>p</i> | estimate            | SE    | <i>t</i> | <i>p</i> | estimate        | SE    | <i>t</i> | <i>p</i> |
| <b>Vocal diversity: mean optimal number of clusters</b> |                   |       |          |          |                     |       |          |          |                 |       |          |          |
| Japanese vs. rhesus macaque                             | + 0.008           | 0.089 | + 0.09   | 0.999    | - 0.483             | 0.089 | - 5.41   | < 0.001  | - 0.710         | 0.080 | - 8.88   | < 0.001  |
| Japanese vs. Tonkean macaque                            | - 0.344           | 0.082 | - 4.19   | < 0.001  | - 0.666             | 0.086 | - 7.71   | < 0.001  | - 0.435         | 0.084 | - 5.17   | < 0.001  |
| Japanese vs. crested macaque                            | - 0.247           | 0.084 | - 2.95   | 0.017    | - 0.725             | 0.086 | - 8.47   | < 0.001  | - 0.289         | 0.087 | - 3.33   | 0.005    |
| rhesus vs. Tonkean macaque                              | - 0.352           | 0.082 | - 4.28   | < 0.001  | - 0.183             | 0.075 | - 2.45   | 0.068    | + 0.275         | 0.070 | + 3.94   | < 0.001  |
| rhesus vs. crested macaque                              | - 0.255           | 0.084 | - 3.04   | 0.013    | - 0.242             | 0.074 | - 3.28   | 0.006    | + 0.421         | 0.073 | + 5.78   | < 0.001  |
| Tonkean vs. crested macaque                             | + 0.097           | 0.077 | + 1.26   | 0.586    | - 0.059             | 0.070 | - 0.84   | 0.835    | + 0.146         | 0.077 | + 1.89   | 0.232    |
| <b>Vocal flexibility: mean entropy value</b>            |                   |       |          |          |                     |       |          |          |                 |       |          |          |
| Japanese vs. rhesus macaque                             | + 0.006           | 0.002 | + 4.02   | < 0.001  | + 0.020             | 0.002 | + 8.78   | < 0.001  | - 0.008         | 0.001 | - 6.30   | < 0.001  |
| Japanese vs. Tonkean macaque                            | - 0.097           | 0.002 | - 61.4   | < 0.001  | - 0.034             | 0.002 | - 14.8   | < 0.001  | + 0.046         | 0.001 | + 36.1   | < 0.001  |
| Japanese vs. crested macaque                            | - 0.053           | 0.002 | - 33.2   | < 0.001  | - 0.070             | 0.002 | - 30.2   | < 0.001  | + 0.010         | 0.001 | + 7.73   | < 0.001  |
| rhesus vs. Tonkean macaque                              | - 0.104           | 0.002 | - 65.4   | < 0.001  | - 0.054             | 0.002 | - 23.6   | < 0.001  | + 0.054         | 0.001 | + 42.4   | < 0.001  |
| rhesus vs. crested macaque                              | - 0.059           | 0.002 | - 37.3   | < 0.001  | - 0.090             | 0.002 | - 39.0   | < 0.001  | + 0.018         | 0.001 | + 14.0   | < 0.001  |
| Tonkean vs. crested macaque                             | + 0.045           | 0.002 | + 28.2   | < 0.001  | - 0.036             | 0.002 | - 15.4   | < 0.001  | - 0.036         | 0.001 | - 28.4   | < 0.001  |

**Table 4. Distribution of call types per cluster for each species and social context.**

| <b>Context and species</b> | <b>Cluster No<sup>1</sup></b> | <b>Bark</b> | <b>Hard grunt</b> | <b>Scream</b> | <b>Screech</b> | <b>Rattle</b> | <b>Gecker</b> | <b>Chuckle</b> | <b>Growl</b> | <b>Girney</b> | <b>Soft grunt</b> | <b>Affiliative call</b> | <b>Coo</b> | <b>Food call</b> | <b>Unclassified<sup>2</sup></b> |
|----------------------------|-------------------------------|-------------|-------------------|---------------|----------------|---------------|---------------|----------------|--------------|---------------|-------------------|-------------------------|------------|------------------|---------------------------------|
| <b>Agonistic context</b>   |                               |             |                   |               |                |               |               |                |              |               |                   |                         |            |                  |                                 |
| Japanese macaque           | 1                             | 7           | 0                 | 25            | 0              | 2             | 0             | 3              | 3            | 0             | 0                 | 0                       | 3          | 2                | 8                               |
| Japanese macaque           | 2                             | 0           | 0                 | 17            | 0              | 1             | 0             | 0              | 0            | 0             | 0                 | 0                       | 0          | 1                | 7                               |
| rhesus macaque             | 1                             | 58          | 0                 | 5             | 0              | 0             | 1             | 0              | 18           | 0             | 0                 | 0                       | 0          | 0                | 0                               |
| rhesus macaque             | 2                             | 8           | 0                 | 19            | 0              | 0             | 1             | 4              | 0            | 0             | 0                 | 0                       | 0          | 0                | 4                               |
| Tonkean macaque            | 1                             | 1           | 8                 | 9             | 3              | 1             | 3             | 9              | 0            | 0             | 2                 | 0                       | 1          | 0                | 14                              |
| Tonkean macaque            | 2                             | 2           | 4                 | 1             | 0              | 22            | 9             | 28             | 0            | 0             | 4                 | 0                       | 5          | 0                | 19                              |
| Tonkean macaque            | 3                             | 5           | 12                | 7             | 11             | 13            | 3             | 29             | 0            | 0             | 5                 | 0                       | 10         | 0                | 30                              |
| crested macaque            | 1                             | 0           | 5                 | 1             | 0              | 5             | 4             | 42             | 0            | 0             | 0                 | 0                       | 1          | 0                | 13                              |
| crested macaque            | 2                             | 3           | 8                 | 38            | 0              | 2             | 0             | 13             | 0            | 0             | 1                 | 0                       | 2          | 0                | 13                              |
| crested macaque            | 3                             | 0           | 2                 | 38            | 0              | 1             | 0             | 4              | 0            | 0             | 0                 | 0                       | 0          | 0                | 5                               |
| <b>Affiliative context</b> |                               |             |                   |               |                |               |               |                |              |               |                   |                         |            |                  |                                 |
| Japanese macaque           | 1                             | 0           | 0                 | 0             | 0              | 0             | 0             | 0              | 10           | 15            | 1                 | 0                       | 29         | 0                | 4                               |
| Japanese macaque           | 2                             | 0           | 0                 | 0             | 0              | 0             | 0             | 0              | 2            | 4             | 0                 | 0                       | 26         | 2                | 1                               |
| rhesus macaque             | 1                             | 0           | 0                 | 0             | 0              | 0             | 0             | 0              | 2            | 1             | 0                 | 0                       | 0          | 0                | 1                               |
| rhesus macaque             | 2                             | 0           | 0                 | 0             | 0              | 0             | 0             | 0              | 1            | 0             | 0                 | 0                       | 0          | 3                | 0                               |
| rhesus macaque             | 3                             | 0           | 0                 | 0             | 0              | 0             | 0             | 0              | 40           | 5             | 0                 | 3                       | 1          | 0                | 2                               |
| Tonkean macaque            | 1                             | 0           | 4                 | 0             | 0              | 1             | 0             | 0              | 0            | 0             | 84                | 5                       | 39         | 0                | 5                               |
| Tonkean macaque            | 2                             | 0           | 2                 | 2             | 0              | 0             | 0             | 0              | 0            | 2             | 14                | 0                       | 2          | 0                | 0                               |
| Tonkean macaque            | 3                             | 0           | 0                 | 0             | 0              | 0             | 0             | 0              | 0            | 0             | 28                | 0                       | 36         | 0                | 2                               |
| crested macaque            | 1                             | 0           | 0                 | 0             | 0              | 0             | 0             | 0              | 0            | 4             | 15                | 0                       | 22         | 0                | 5                               |
| crested macaque            | 2                             | 0           | 0                 | 0             | 0              | 0             | 0             | 8              | 0            | 0             | 15                | 0                       | 13         | 0                | 2                               |
| crested macaque            | 3                             | 0           | 0                 | 0             | 0              | 0             | 0             | 0              | 0            | 5             | 32                | 2                       | 37         | 0                | 15                              |
| crested macaque            | 4                             | 0           | 0                 | 0             | 0              | 0             | 0             | 4              | 0            | 0             | 58                | 3                       | 37         | 0                | 20                              |
| <b>Neutral context</b>     |                               |             |                   |               |                |               |               |                |              |               |                   |                         |            |                  |                                 |
| Japanese macaque           | 1                             | 0           | 0                 | 0             | 0              | 0             | 0             | 0              | 0            | 6             | 0                 | 0                       | 121        | 73               | 0                               |
| Japanese macaque           | 2                             | 0           | 0                 | 6             | 0              | 0             | 0             | 0              | 0            | 0             | 0                 | 0                       | 15         | 34               | 0                               |
| rhesus macaque             | 1                             | 7           | 0                 | 0             | 0              | 0             | 0             | 0              | 130          | 0             | 0                 | 10                      | 6          | 0                | 2                               |
| rhesus macaque             | 2                             | 9           | 0                 | 1             | 0              | 0             | 0             | 0              | 12           | 0             | 0                 | 0                       | 31         | 38               | 1                               |
| rhesus macaque             | 3                             | 0           | 0                 | 0             | 0              | 0             | 0             | 0              | 0            | 0             | 0                 | 0                       | 35         | 5                | 0                               |
| rhesus macaque             | 4                             | 25          | 0                 | 0             | 0              | 0             | 1             | 0              | 52           | 0             | 0                 | 0                       | 51         | 41               | 4                               |
| Tonkean macaque            | 1                             | 0           | 0                 | 0             | 1              | 0             | 0             | 1              | 0            | 0             | 21                | 0                       | 67         | 0                | 3                               |
| Tonkean macaque            | 2                             | 0           | 0                 | 2             | 0              | 1             | 0             | 9              | 0            | 0             | 9                 | 0                       | 1          | 0                | 2                               |
| Tonkean macaque            | 3                             | 0           | 0                 | 0             | 0              | 0             | 0             | 0              | 0            | 0             | 2                 | 0                       | 81         | 2                | 0                               |
| crested macaque            | 1                             | 2           | 1                 | 0             | 0              | 0             | 0             | 2              | 0            | 0             | 0                 | 0                       | 43         | 0                | 8                               |
| crested macaque            | 2                             | 1           | 7                 | 0             | 0              | 0             | 0             | 11             | 0            | 0             | 0                 | 0                       | 84         | 0                | 18                              |
| crested macaque            | 3                             | 0           | 1                 | 0             | 0              | 0             | 0             | 0              | 0            | 0             | 0                 | 0                       | 13         | 0                | 0                               |

<sup>1</sup>Numbers correspond to the  $n$  different clusters identified by the clustering method.

<sup>2</sup>Calls that could not be assigned to recognized call types.

## References on the call types recognized in macaques

- Green S. 1975 Variation of vocal pattern with social situation in the Japanese monkey (*Macaca fuscata*): a field study. In: LA Rosenblum (ed), *Primate behavior: developments in field and laboratory research*, Vol 4. Academic Press, New York, NY, pp 1–102
- Lewis SA. 1985 *The vocal repertoire of the Celebes black ape (Macaca nigra)*. PhD thesis, University of Georgia, Athens, GA
- Lindburg DG. 1971 The rhesus monkey in North India: an ecological and behavioral study. In LA Rosenblum (ed), *Primate behavior: developments in field and laboratory research*, Vol 2. Academic Press, New York, NY, pp 1–106
- Masataka N, Thierry B. 1993 Vocal communication of Tonkean macaques in confined environments. *Primates* **34**, 169–182
- Panggur MR. 2013 *Vocal communication of wild crested macaques (Macaca nigra)*. MS thesis, Bogor Agriculture, Bogor University.
- Peters EH. 1983 *Vocal communication in an introduced colony of feral rhesus monkeys (Macaca mulatta)*. PhD thesis, University of Florida, Gainesville, FL
- Rowell TE, Hinde RA. 1962 Vocal communication by the rhesus monkey (*Macaca mulatta*). *Proc. Zool. Soc. Lond.* **138**, 279–294.
